# Supplementary material for: DNA methylome analysis provides evidence that the expansion of the tea genome is linked to TE bursts
Source: PubMed Central journal article supplement (PMC6419580; doi:10.1111/pbi.13018), 2018-10-15
Supplement: PBI-17-826-s002.pdf [file PBI-17-826-s002.pdf]

Table S1. Summary of BS-seq reads mapping.

| Sample    | Total reads | Uniquely Mapped | Mapped ratio (%) | mCG    | mCHG   | mCHH   | Conversion rate | Coverage |
|-----------|-------------|-----------------|------------------|--------|--------|--------|-----------------|----------|
| Leaf_rep1 | 692,216,842 | 504,815,337     | 72.93            | 82.27% | 70.13% | 10.49% | 99.81%          | 25.06    |
| Leaf_rep2 | 664,342,280 | 468,145,810     | 70.47            | 82.33% | 70.32% | 9.69%  | 99.87%          | 23.24    |

Table S2. The qRT-PCR primers and  $2^{-\Delta\Delta CT}$  value

| Gene        | Forward primer<br>(5'-3') | Rverse primer<br>(5'-3') | $2^{-\Delta\Delta CT}$ | Ave_FPKM |
|-------------|---------------------------|--------------------------|------------------------|----------|
| CSA022741.1 | CCAGGAGGTTGCCGATAACA      | TCGCCTGGAAGAAAAGTCTGCT   | 0.062054               | 9.89088  |
| CSA033157.1 | GTGAAGGGTTGGACTCTGGG      | CGAGCATCTGGGGAAGTGTT     | 0.007335               | 6.42526  |
| CSA003130.1 | TTACTGGGCAGAGAAAGGCG      | ATATCCTCTTGGCCCCTGGT     | 0.003302               | 3.2686   |
| CSA033069.1 | GGGCAACCCCTGCATTATCT      | TGGGTCAGAGAGCCAGAGTT     | 0.025595               | 5.54529  |
| CSA020735.1 | ACTGAGTCTGATGCCCTTGC      | CAGCTTGAACCACTTTGCC      | 0.01306                | 8.02238  |
| CSA021730.1 | GTAGGTGGGGACAACGAAGG      | ATGAACCATCCGGGAACACC     | 0.131406               | 11.9791  |
| CSA016856.1 | CGGGGAAAAGGAAGCCTGAT      | CTTGGGCGACCACTTCTCAT     | 0.082188               | 57.3644  |
| CSA016903.1 | GAACTTGGCCTGGGCATACT      | CCAGGTTGCACTGCTTGTTTC    | 0.000668               | 1.51594  |
| CSA030036.1 | GCGCCAAAAGTGCAGAAAGA      | GAAGTGTCTTCGGCAGGTCA     | 0.002423               | 10.0673  |
| CSA001781.1 | CCCTGGAGGCATCAACCTTT      | CTTGCTGGTTGGTTTGCTCC     | 0.000847               | 3.48661  |
| CSA030020.1 | GGGCAAGTGCACCAATGAAG      | GGAAGGGACGCAAGATGGAA     | 0.001048               | 2.27703  |
| CSA024443.1 | GGTTTCAGCACTGGGCAAAG      | CGGTGCAGAACAAATAGGCG     | 0.006628               | 4.76682  |
| CSA007759.1 | AATGAATGCTCTGGCGGTGA      | TCCATCGGGGTCACAGTTTG     | 0.002128               | 12.977   |
| CSA018589.1 | TTCCTGGATTCCACCTTGCC      | CCCATCTTTGAATGCCCCCT     | 0.000337               | 3.90207  |
| CSA000647.1 | GGGTGGCGATCATTGCTTTC      | CTTGGTCCCAGAGACAACC      | 0.000603               | 1.91191  |
| CSA034653.1 | CCGGAGGGTTTCACGAAGAA      | AGCCACTAGTCCTTTTCCGC     | 0.000334               | 4.18459  |
| CSA001531.1 | TGGGCAGAGTGGTCGAAATC      | GTGCTTTTTCAATGGCCGGT     | 0.014916               | 13.0907  |
| CSA033342.1 | CAACACCAGTTCAATGCCCG      | TCAACCACCCTACGAACAGC     | 0.004173               | 20.4559  |
| CSA021101.1 | TGCTTTGTGTGCTAGAGGCA      | TGTGCAGTCATCCATCCCAC     | 0.000947               | 2.91624  |
| CSA003297.1 | GTTTGTAGCTGAGGACCCCC      | GAGTCTCCCTAAGGCCATGC     | 0.004018               | 5.3044   |
| CSA002777.1 | CAAGTCTACGTCCACGGCTT      | CATTGCAGCGATCCTTGAGC     | 0.000183               | 2.55959  |
| CSA018787.1 | AGGAGTGAAAGCTCGGAAGC      | CGGACCTCACACTTCCCTTC     | 0.000105               | 0.987532 |
| CSA002812.1 | CGGTTGTTGAGCCTGGTTTG      | GAGCAGCCTCCTCACAACAT     | 0.006911               | 11.2352  |
| CSA032127.1 | ATATGGGGCTCCAAGGGAGT      | GGAGGAAGGTCACAGATGGC     | 0.000992               | 2.48205  |
| CSA030966.1 | ATCACTGCGACTCCTTTGGG      | GCACCTAGGCACAATCCAGT     | 0.000189               | 3.81276  |
| CSA023919.1 | TGGCTACTTGTTGCATCCGT      | GGCACAAGAATGGGGACTGA     | 0.001625               | 11.5655  |
| CSA015026.1 | CGGTGTATCATCCGACAGGG      | CGAAAGCCAGCACACTTGTC     | 0.007525               | 2.85557  |
| CSA008802.1 | AGGTTACAGGCGTGTACTG       | TATGCCAGTGCCAGGAAAG      | 0.119118               | 23.2597  |
| CSA013061.1 | TCTGTGAACCAACTGCGGTA      | TCCACAGCTTTCTGAGCTTG     | 0.000108               | 3.41522  |
| CSA002792.1 | TGGCACTCTCTGGAGGCTAT      | TGACTGTGTCTTGCTCGTCC     | 0.002105               | 8.60674  |
